# Supplementary material
Source: HighWire-hosted journal article supplement (http://dmd.aspetjournals.org/highwire/filestream/66673/field_highwire_adjunct_files/0/Wang_supplement.pdf)
Supplement: Wang_supplement.pdf [file Wang_supplement.pdf]

## Supplemental data

**Journal:** *Drug Metabolism and Disposition*

**Title:** Identification of *CYP2W1* genetic polymorphisms in the three main Chinese ethnicities: Han, Tibetan, and Uighur

**Authors:** Yanwei Li, Xing Kang, Ge Yang, Penggao Dai, Chao Chen, and Huijuan Wang

**Legends for supplemental figures and tables**

**Supplemental Figure 1.** The location of amplification primers in *CYP2W1* gene sequence (reference sequence: NC\_000007.14), which was highlighted in different colors.

**Supplemental Table 1.** Primers for *CYP2W1* amplification and sequencing.

**Supplemental Table 2.** Frequency of identified *CYP2W1* nsSNPs in different populations.

**Supplemental Table 3.** Allelic distribution and comparison of identified variants in *CYP2W1* in three populations.

## Supplemental Figures

| Physical position | sequence                                                      |          |
|-------------------|---------------------------------------------------------------|----------|
| 982, 199          | tagtgagetc cccaccacag gaggcgtgca actgtgctg gggc <b>tttccc</b> | Fp1      |
| 982, 249          | <b>tcccagctaa</b> tcaagggga ccaaccggg aggggtgagg gcctcaggct   |          |
| 982, 299          | gcctcggetc tgcggttegt acagggcatg ggcaacgccc cagagacagg        |          |
| 982, 349          | ctgtggggag ggtcccgcct gctggcacca gctccagctg cctcatgtca        |          |
| 982, 399          | gggcaggctg tgcaaacgag gcccgggcgc ttctgctgcc agcagccctc        |          |
| 982, 449          | ccaccctca cagcggttta ggagacagat ggacaggget cgtaaacCcc         |          |
| 982, 499          | gccacctgcc accggcagc ctttccatgt tctgtccta gctcagaggg          |          |
| 982, 549          | ttgcatcccc tgcccgggog gcagccctcg aaaaggagca ggetgctacc        |          |
| 982, 599          | tggggcgaga acaccctcag ggagatgcag gtggtggcct gtgaggactg        |          |
| 982, 649          | tgggatttga gtcccctcat gggcctccct gaggtctcac tctgtccct         |          |
| 982, 699          | tgccccgtgg ggagctgate agagaagagc tgggtgcaca cggatgggg         |          |
| 982, 749          | ttgggagagg cctgcaaacc ctgagctcca cagggtccca ctcagagcct        |          |
| 982, 799          | gtgaaaggca gggggetccc ctccaagcca gggcctcggc cccaaagccc        |          |
| 982, 849          | tgtgaatccc agttctgagg ggtggccaag gccaaagggc ctggactggc        |          |
| 982, 899          | aggttcagca gaaccagggg cagaacagtc cacgtgccac atccttctct        |          |
| 982, 949          | ctggccagga gacatggatg cctgacccca gagggccccc gtccctgcct        |          |
| 982, 999          | cccctccccg gccccaccag ggctcagcc ccacattcca cgcaggcctg         |          |
| 983, 049          | cagetttaag ccatcogctg ggggctgccc tgc <b>aaactgc tegtccaca</b> | Rp Fp2   |
| 983, 099          | <b>ttctc</b> gggggt ggtgggggtg gtgggtgcg ggcacgcct cccgcggagg |          |
| 983, 149          | cctataaggg tgcggggggg acggggccca ggaggggagt ggagcctcac        |          |
|                   |                                                               |          |
| 983, 199          | cagccacgtc ctcATGGCCC TGCTGCTCTT GCTGTTCTG GGCCTCCTGG         | Exon 1   |
| 983, 249          | GGCTCTGGGG GCTGCTCTGC GCCTGCGCCC AAGACCCCTC CCCAGCTGCC        |          |
| 983, 299          | CGGTGGCCCC CGGGGCTCG CCCGCTGCCG CTCGTCGGGA ACCTGCACTT         |          |
| 983, 349          | GCTGCGTCTG TCGCAACAGG ACCGGTCCCT GATGGAGGTA AGTCAGGGAG        | Intron 1 |
| 983, 399          | CCCGGCAGC TCTTGCCGCT TGGACAGCTG CCGTGTCTG GCCCCCTCC           |          |
| 983, 449          | TGGGAAGCC CAGCCCGTT TCCA CTGCTT GTTCCCACAT GGTGCCGGG          |          |
| 983, 499          | CCAGCGGGG ACGCAGGAG CCGGAGGGC CACCCTGCTT TTGGGAGGG            |          |
| 983, 549          | AAAGCCACC CGTCCACAG GGAAGCAGAC AACTGAGTA CGAAGAAGCC           |          |
| 983, 599          | CTGAGGTGC CACCCAGGG CCGGCGCGG AGCAGGAGTC TGGAGGGCTC           |          |
| 983, 649          | CCTGGAGCG GTGGCTCTG CTGAGAGCCC GCAGGAGCC AGGCTTAGGG           |          |
| 983, 699          | ACAGCAGAG GGAGGAGGG CTGGCCTGT CGGCTGCCTG CTCAGCCCC            |          |
| 983, 749          | CTCGGCCCTC AGGTGTTCAA CAGCAAACAC TTCCACTTT TGAGCCTCTG         |          |
| 983, 799          | TTTCTCATC TGTGAAATGG GAAGAGGACC TGTGCCTCCT GGCAGGGAT          |          |
| 983, 849          | GCTGAGGACA GAGGTACGG GGACACGGCA CGGGCAGC <b>ttctc</b>         | Rp2      |
| 983, 899          | <b>ttctc</b> ttctcctcgtccta ggcaggcagg gtcagtggga cagggctgac  |          |
| 983, 949          | cagtcaggcc cgggcccctgc ctccggctgc ccCaaactgc gggctgggg        |          |
| 983, 999          | GCTGTGGCC GGGCTGTAGC CGAAGACGGA TCAGGTCTC TGGGGCCGA           |          |
| 984, 049          | GCCTGTCAAG CCCTCACTCT GTGCAGACTC TGGCCTTCA GAATGTGCCA         |          |
| 984, 099          | CCCCAGCAGA CAGCCAGCCC CCGACCTGC CGCCTGGACT CAGGGCTTGA         |          |
| 984, 149          | GCCCCCAGG AATTTGGCT AAAAAGAAAA TCCCACAACA GCCATGCCAA          |          |
| 984, 199          | GCACCAGATG GCGAGAGGGC TCTGTGGCT CCAGGCTGGG CGCTGCCCC          |          |

984, 249 TCCACCCTGC **ACCACTGGCT** TTATGGGATC TAGGCGTGCC CCCTCCACCT Fp3  
 984, 299 GCCCCCATTT TCCCTCTGTC CCCACCCTA CCCAGCACAG GCCCGGCTG  
 984, 349 AGGGGACCTA AGGGGGTCT TGTGGGTGAG GGCTGCCCGG GTGACCCCCG  
 984, 399 CCATCCCTGC CAGCTCTCAG AACGCTACGG GCCGGTGTTC ACCGTGCACC Exon 2  
 984, 449 TGGGGCGCCA GAAGACGGTG GTGCTGACGG GGTTCGAGGC GGTCAAAGAG  
 984, 499 GCGCTGGCGG GCCCCGGGCA GGAGCTGGCC GACCGGCCTC CCATCGCCAT  
 984, 549 CTTCCAGCTC ATCCAGCGAG GTGGAGGTGC GTGTGTGGC GGCCTACGG Intron 2  
 984, 599 GGCCTACTGG GTGTGGGGC ACCTGGACCC CAGGAGGGGT GGGGGCTCCA  
 984, 649 GCAGCGGGAG AGGCTCCAG GGTGGCCTGG GGAAGAGCAG GCAGGAGCTG  
 984, 699 GGCCTCCGGG CTGGTCTGA GAAGGGCCAG GTGTCCACAC AGCAGGTGAG  
 984, 749 GTGCTCAGAA CCAGCAAGCG **GGTTCTTTT** **CATCCCAAGT** CAAGAGGGGC Fp4  
 984, 799 CAGGGCCAGC CCAGGGGAC GGGAGTGGG ATGGGGTGA GGGCCAGCC  
 984, 849 AGTCTCGCTG CCCTGTCAGC CTGCTCACTT CCTGCCACT TGCCTGGCGG  
 984, 899 GGCTGGCTGG GGTGGGAACC TGGGCTACC ACGC**ACTGTA** TCTGGCTAGA Rp3  
 984, 949 **CGCATCTTCT** TCTCATCTGG GCGCGCTGG AGGGCTGCC GCCAGTTCAC Exon 3  
 984, 999 GGTGCGTGCC CTGCACAGCC TGGGCGTGG CCGGGAGCCG GTGGCTGACA  
 985, 049 AGATTCTGCA GGAGCTGAAA TGCTCTCTG GGCAGCTGGA TGGCTACAGA  
 985, 099 GGTGAGCAGG GGGCCGGGA CGCCCTCCC CGGGCTGGA CGTGCCTGAG Intron 3  
 985, 149 GCCCGTCTCC CTCGAGGCC GGCCTTCCC GCTGGCCCTA CTGGGCTGGG Exon 4  
 985, 199 CTCCTCCAA TATCACCTTC GCGCTCTCT TCGGCCCGG ATTTGACTAC  
 985, 249 CGGGACCCG TGTTTGTGTC CCTGCTGGT CTCATCGATG AGGTATGGT  
 985, 299 CCTCTGGGG TCCCCTGGCC TGCAGGTGAG GAGCTGCCTC CCATCCTTGG Intron 4  
 985, 349 GGTGGGTGG AGCCTGGAGT GATGGGCGT CAGCAGGAGG ACGGGGGCCC  
 985, 399 CAGTGTCTGC CCCTCTCAGC TTCTCGGCC TCC**CACTTG** **CAAAAGGAAT** Rp4  
 985, 449 **CAGATG**CAAG GGCCTGAATC AGGACCCATC CGACGTTAGC TGGTCATGT  
 985, 499 GCCTCAAACC AGCCCTGTG CTCTCCAGGA AATGGGGAT CCCCATCTCC  
 985, 549 CCCACGCCCT CATCAGTAAC AGATGCATCT GCTCAAGAGT GGAGGTGGGA  
 985, 599 GGCAGGCATG GCTTCCCAG AATTGCGGG GGCTCCATGT CTGCCCCCA  
 985, 649 AGCCCTGACA GTCCAGGCAC CTTCCTGCTG ACGCCCTTA CAGTGCCCCA  
 985, 699 AAACCACAAA AGTTCACCC TCTGATGTTT GGAATCGTG TATTTCAATT  
 985, 749 AGCTCAAAA TGAAAGATC CCCTCTTTT GTCCTCATG GTATTTGATG  
 985, 799 TCGGTTTACC GAAGCCTGCA TCTCAGGTGT GATACCTGCA TCACGGCTGG  
 985, 849 ACCCAGAGAC CACGGTCTT AGTCTCTCTG GCTTCCAGA GGCAGGGCCG  
 985, 899 TGATGGGAGT GAGTGAGCAG CGGTGGGTTT ACAAGCGAGA GCAGGGGGCA  
 985, 949 CAGCTTCCAC CCGTCTAGC CAGGGTGAGA CCACCTGCC TGCTGGTGGG  
 985, 999 GCCAGGCAGG CCCAGAGCCC ACCTGGAAGA TGGAGGCTGC ACGGCACTGC  
 986, 049 GTGTCCCGG GCAGCCCAG GGCAGCAGAG CATTCCCTGG CCTTCCCTGC  
 986, 099 TGTTGC**CAGC** **TCCTTACCAC** **AGAGACC**CCG CGTGGAACTC ACTACTGGCG Fp5  
 986, 149 ATCGCGGACG CCCAGGAAG GCGAGTGCA CGAGGTGTGG CGGGGCTGCC  
 986, 199 ACAGGCAGTC ACGGAGCACC CGTGGTGC AGGCTACCC CTCAGATAA  
 986, 249 GCCTCGTGG CTGGCTCAGT GCGGCCCTG ACTTCCAAG GTCTGAGGTC  
 986, 299 TGCTCTGTCT TCCATTCCAT GACTCACAGG AGGTCAAGG TTACTTCCAC  
 986, 349 TGTGGCAGCT GCCTCCCTCC TCCCTCTCCA GGATGGAAGG AGGTCTGCT  
 986, 399 GTGCAAACCT GCCTGGCTGT CCCCTCCGG GACACGGACA GGGGGTTCC  
 986, 449 TGGCAGTTC TGGTCTCC TTAGGGGCTA AGGGTCCCC CGTTCTGTGG

986, 499 CCGCCTCCAG CACATCCACC CAGAGTCCTT GGGCGTGAAC ACAGCCGCTG  
 986, 549 GGGACGATCA CCGCCTGCCC AGCGTGCAGC CCTGGGGCTG CGTCCTTATC  
 986, 599 TCCGCTCCTC CTGCCTCCTG CCCAGCTGTT CAACGTCTAC CCATGGCTCG Exon 5  
 986, 649 GGGCCCTGCT CCAGCTGCAC CGGCCCGTCC TGC GCAAGAT CGAGGAGGTC  
 986, 699 CGTGCCATTC TGAGGACCCT CCTGGAGGCG CGGAGGCCCC ACGTGTGCC  
 986, 749 GGGGGACCCC GTGTGCAGCT ATGTGGACGC CCTGATCCAG CAGGGACAGG Intron 5  
 986, 799 TGTGTCGGGA CCCAAGACCT CCTTGAAGGC CTGTAGGGGT CCTGAGGGAC Rp6  
 986, 849 ACCCCAGGGG AGCACGGCTG GGGAGGGGTC CATACTGGTC CTGCACCAAG  
 986, 899 CTCCTACCT CCTGGCTGGG GGCCTCTCAG AGCCTCAGTC TCCTTGTCTG Rp5  
 986, 949 TGAACCGGG CATCCATAGT GCCTGCCTCG GGGACGCTGA GGGATGGCTG  
 986, 999 AGCCAGATC ACCGGGGCAT CCATAGTGA GCCCAGGGT GGGCTGGGTC  
 987, 049 TGTGGGGTGG GGGACAGACC CCAGATCATC CCACGAGCCC TGCCCCACGC  
 987, 099 CTCTGCAGGG GGATGACCCC GAGGGCCTGT TTGCTGAGGC CAACGCGGTG Exon 6  
 987, 149 GCCTGCACCC TGGACATGGT CATGGCCGGG ACGGAGACGA CCTCGGCCAC  
 987, 199 GCTGCAGTGG GCCGCACTTC TGATGGGCCG GCACCCGGAC GTGCAGGGTG Intron 6  
 987, 249 AGACCCCGGC GCCTGGCGAG ACGGCTCCTT CTGCCCCCGG GGGACCCCA  
 987, 299 GGGACGAGGG ATGGCGCTGC CACCCAAGCG GCCCACCCTT TGCCCCAGGC Exon 7  
 987, 349 CGGGTGCAGG AGGAGCTAGA CCGCGTGTG GGCCTGGGC GGACTCCCCG  
 987, 399 GCTGGAGGAC CAGCAGGCTC TGCCTACAC AAGCGCCGTG CTCCACGAGG  
 987, 449 TGCAGCGGTT CATCACGCTC CTGCCGACG TGCCCCGCTG CACCGCGGCC  
 987, 499 GACACACAGC TGGGCGGCTT CCTGCTCCCC AAGGTGGGGC TGGGCTCCC Intron 7  
 987, 549 TTGCCCTTC CATCTCTCT GGGTAGGCC TCGCGGGGG TCCAGGGGCA  
 987, 599 CTGGGACGGC TGAGCGTCTG GTGGGTGCTT GATGGCCAG CGCTCCCCGA  
 987, 649 CCGGAGGCAA TAAAGGCGT CCAGCCAGGA GCAGGAGGA GGCAGCCCTC  
 987, 699 TCACCCACA GCCCAGCACT TGGCCTGGCC AGCAGACCTG GCGCCTCCCT  
 987, 749 GCATGTCCTG GGGTCCCCTC CGTGTCTCT GTGGCATCC CTGTCCATGT Rp6  
 987, 799 GTCCTAGGCG ATCCCCTCG TGTGTCTGG GGGTCCCCTC TGTATCTGG  
 987, 849 GGGGGTCCCC TCTGTGTGTC CTGGGATCC CCTGTGTGTC CTGAGGGGTC  
 987, 899 CCCTCTGTGT GTCCTGGGA TCCCTGTGT GTCCTGGGG GGTCCCCTGT  
 987, 949 GTGTCTGGG GGTCCCCTCT GTGTGTCTG GGGGGTCCC CTCTGTGTGT  
 987, 999 CCTGGGGGT CCCCTCTGTG TGTCTGGG GTCCCCTCTG TGTGTCTGG  
 988, 049 GCGTCCCTC TCCATGATC CTGGGTGTC TCTCTATCTT TGGGGCCCCT Rp7  
 988, 099 GGCTGTGTG CCTGGGGTCA TGTGGCTCC CTGGGTTGG GTGCCTACC  
 988, 149 TGCAAGTGG GCTAACACCA GGTGTGGTGG GTGTGGCAGG AGCTACATCC  
 988, 199 TGGAATGAAA CTGCCAACC CAGGCCCAT CCCATCTCC CCGGGGCC  
 988, 249 TCTCTGTGT CCCCAGTGC CCCACAGGG CACGCCCGTG ATTCCCCTGC Exon 8  
 988, 299 TGACCTCGGT GCTCCTGGAT GAGACACAGT GGCAGACCC AGGCCAGTTC  
 988, 349 AACCCCGCC ATTTCTGGA CGCGAATGG CACTTTGTGA AGCGGGAGGC  
 988, 399 CTTCTGCCT TTCTCTGCAG GTCAGACCC CTCGGGGCCG GGTGGGGCG Intron 8  
 988, 449 GCACCTCCAG GGCTCCAGGG GTGGGACGGC CCCAGCTCCG CCTGCCGCT  
 988, 499 CTGCACCCAC CTCCGATCT CAGGTCTGA AGCCGGCTGT GGTGGCTGCT Rp7, Rp8  
 988, 549 CCTGTGCTCC CCTGGGGAGG TCCCACCCC TCCCCTCCAG GAGCAGGCCT  
 988, 599 GGTGCAGCCC ACTCTGTGCC TGGACATCC CCGCAGGCCG CCGGTCTGT Exon 9  
 988, 649 GTTGGGAGC GCCTGGCCAG GACCGAGCTC TTCCTGCTGT TTGCCGGCCT  
 988, 699 CCTGCAGAGG TACCGCCTGC TGCCCCGCC TGGCGTCACT CCGGCTCCC

988, 749 TGGACACCAC GCCCGCCCGG GCTTTTACCA TGAGGCCGAG GGCCAGGCC  
 988, 799 CTGTGTGCGG TGCCAGGCC CTAGgagctc cccagcccc caggtcctcc  
 988, 849 tgaccactcc cctcccagcc ctgggtcctc ccacctctc tctcccacc  
 988, 899 ccacagctcG gactgctctg ggagggcctt gaggactccc acctcacc  
 988, 949 ccacccccac agggtcagca actg**ttccg gttaca cca ggactaccc** Rp8, Fp9  
 988, 999 **tgcccgacc** tgtgggacce ccacctctt gatgctgtct gcagctcagt  
 989, 049 ccctgccagc cccagggagc gcctccaggc cccgccccac tctcccacc  
 989, 099 ctgaagctgc actcccacc acctagctcc cccagggcc ccccagcacc  
 989, 149 tacagctggg gctgcaggga gacaacgggt ggctgcatcc agccagagac  
 989, 199 aggcgcaggt ggggtgtcctc agcgtgcgag ccctgcacc cccaggtcct  
 989, 249 gggactcctg cagaccccc tccattcccg ctctggaac acttctgca  
 989, 299 gctgtgcctg gaggcagtcg gcctgcagtg ccagactctg agccaagcca  
 989, 349 ctggggccat gcgtatgact ggtgcaggga ggcaaggccc acattctct  
 989, 399 tcagagacag gcaactggcg cagaggcttc cttggggcgg ggggagggca  
 989, 449 cctcagccc tgaagacaag cagcaactga gtggcaaaaa tggaaacact  
 989, 499 gaccgggtgc ggtggtctat gcctgtaatc cc**dgcattt** gggaggccga  
 989, 549 ggcaggcgaa tcacaggtc aggagttcga gaccagcctg cccaacatgg  
 989, 599 tgaaacctg tctctactaa aaatacaaaa aaattaaccg agc

989, 642 atggtggcac gtgcctgtaa tcccagctac tcaggaggct gagacaggag  
 989, 692 aatcgcttga actgggagge agaggttga gtgagccgag ttcgaccac  
 989, 742 tgcactccag cctgggtgac agagcgagat tccatctca **acaacagaa** Rp9  
 989, 792 **ggaaaatgctg** agccacacag tggcacatgt gctggggcgg gtgtggtcgg  
 989, 842 cagtgtgaca gtggcacgtg tgctgggggc ggtgtggtcgc gcagtgtgag  
 989, 892 tggcgcgtgt gctggtggcg gtgtggtcgg cagtgtgagt ggcacctgtg  
 989, 942 ctggtggtgg cgtggtcggc agtgtgagtg gcgcgtgtgc tggggcggt  
 989, 992 gtggtcggca gtgtgagtgg cgcgtgtgct gggggcggtg tggtcggcag  
 990, 042 tgtgagtggc gcgtgtgctg gggcggtgtg ggtcggcagt gtgagtggcg  
 990, 092 cgtgtgctgg gggcggtgtg gtcggcagtg tgagtggcgc gtgtgctggg  
 990, 142 ggcggtgtgg tcggcagtgt gagtggcgcg tgtgctgggg gcggtgtggt  
 990, 192 cggcagtgtg acagtggcgc gtgtgctggg ggtggtgtgg tcggcagtgt  
 990, 242 gacagtggcg cgtgtgctgg gggcggtgtg gtcggcagtg tgacagtggc  
 990, 292 gcgtgtgctg ggggtggtgt ggtcggcagt gtgacagtgg cgcgtgtgct  
 990, 342 gggggcggtg tggtcggcag tgtgacagtg gcgcgtgtgc tggggcggt  
 990, 392 gtgatgggac acctgctgtc tgagacggcc ctggcccccg tcccagcgt  
 990, 442 gaccatgcac gtgagcggca ggcggcccct caccgagaag agaggataag  
 990, 492 ccgtggcaca ttcccacctg cgcacagtga agcggcgccc caaggccagg  
 990, 542 acgtggtggc cgggacacac ggggtgcacg caggcctcac actcccaggt  
 990, 592 ggggcccagc ggtccctaag tcatgggtgg ggctgctgct acgaggcgt

Supplemental Figure 1. The location of amplification primers in *CYP2W1* gene sequence

(reference sequence: NC\_000007.14), which was highlighted in different colors.

Supplemental Table 1 Primers for CYP2W1 amplification and sequencing.

| Region Amplified | Primer name | Sequence(5' -3')         | Product size(bp) |
|------------------|-------------|--------------------------|------------------|
| promoter         | Fp1         | CTTCCCTCCCAGCTAATCAAG    | 862              |
|                  | Rp1         | GAGAATGTGGAACGAGCAGTTT   |                  |
| Exon1            | Fp2         | AAACTGCTCGTTCCACATTCTC   | 828              |
|                  | Rp2         | GCGACAGTGCTAGTCAGGCTG    |                  |
| Exon2            | Fp3         | ACCACTGGCTTTATGGCATCTA   | 698              |
|                  | Rp3         | AAGATGCCTGTAGGCAGATACAGT |                  |
| Exon3&4          | Fp4         | GTTCTTTTCATCCCAAGTCAAGAG | 684              |
|                  | Rp4         | CATCTGATTCCTTTTGCAAGGT   |                  |
| Exon5            | Fp5         | CAGCTCCTTACCACAGAGACG    | 842              |
|                  | Rp5         | GACAAGGAGACTGAGGCTCTGA   |                  |
| Exon6&7          | Fp6         | AGACCTCCTTGAAGGCCTGTAG   | 864              |
|                  | Rp6         | CTGGCTGGACGCCCTTTATT     |                  |
| Exon8            | Fp7         | CATCCTGGGTGTCCTCTCTATC   | 462              |
|                  | Rp7         | AGAACCTGAGATCAGGAGGTG    |                  |
| Exon9            | Fp8         | CTCCTGATCTCAGGTTCTGAAGG  | 492              |
|                  | Rp8         | CAGGGGTAGTCCTGGGTGTA     |                  |
| 3'UTR            | Fp9         | CTCCGGTTACACCCAGGACTAC   | 830              |
|                  | Rp9         | TCGACATTCCTTCTGTTTGTTT   |                  |

Fp, forward primer; R, reverse primer

Supplemental Table 2 Frequency of identified CYP2W1 nsSNPs in different populations.

| CYP2W1 allele                      | A181T(*2) | G376S  | V432I(*4) | P488L(*6) |
|------------------------------------|-----------|--------|-----------|-----------|
| Han Chinese <sup>a</sup>           | 0.02      | 0      | 0.05      | 0.25      |
| Tibetan <sup>a</sup>               | 0.01      | 0      | 0.02      | 0.33      |
| Uighur <sup>a</sup>                | 0.07      | 0.01   | 0.02      | 0.14      |
| Han Chinese <sup>b</sup>           | 0.029     | 0      | 0.043     | 0.28      |
| Uighur <sup>b</sup>                | 0.052     | 0      | 0.009     | 0.173     |
| CHB <sup>c</sup>                   | 0.034     | 0      | 0.0437    | 0.2621    |
| CHS <sup>c</sup>                   | 0.0286    | 0      | 0.0476    | 0.2667    |
| JPT <sup>c</sup>                   | 0.0144    | 0.0045 | 0.0288    | 0.3894    |
| Caucasian (CEU) <sup>c</sup>       | 0.045     | 0      | 0         | 0.1667    |
| African(YRI) <sup>c</sup>          | 0.0833    | 0      | 0         | 0.0648    |
| African-American(ASW) <sup>c</sup> | 0.0656    | 0      | 0         | 0.1393    |

<sup>a</sup>, data are from the present study; <sup>b</sup>, data are cited from Qi et al., 2015; <sup>c</sup>, data are collected from 1000 genomes (<http://browser.1000genomes.org/index.html>)

CHB, Han Chinese in Beijing, n=206; CHS, Southern Han Chinese, n=216; JPT, Japanese in Tokyo, Japan, n=208; CEU, Utah residents with Northern and Western European, n=198; YRI, Yoruba in Ibadan, Nigeria, n=218; ASW, Americans of African ancestry in SW, USA, n=132.



Supplemental Table 3 Genotype distribution and comparison of identified variants in CYP2W1 in three populations.

| SNP ID | Allele A | Allele B | Han      |          |          | Tibetan  |          |          | Uighur   |          |          | H-Wpval |         |        | Fisher's Exact test, <i>P</i> |                   |               |
|--------|----------|----------|----------|----------|----------|----------|----------|----------|----------|----------|----------|---------|---------|--------|-------------------------------|-------------------|---------------|
|        |          |          | AA count | AB count | BB count | AA count | AB count | BB count | AA count | AB count | BB count | Han     | Tibetan | Uighur | Han vs Tibetan                | Tibetan vs Uighur | Han vs Uighur |
| v01    | C        | A        | 50       | 0        | 0        | 50       | 0        | 0        | 49       | 1        | 0        | 1       | 1       | 1      | 1                             | 1                 | 1             |
| v02    | G        | A        | 50       | 0        | 0        | 50       | 0        | 0        | 49       | 1        | 0        | 1       | 1       | 1      | 1                             | 1                 | 1             |
| v03    | T        | C        | 4        | 27       | 19       | 7        | 34       | 9        | 15       | 23       | 11       | 0.346   | 0.026   | 0.865  | 0.078                         | 0.074             | <b>0.012</b>  |
| v04    | G        | A        | 47       | 3        | 0        | 41       | 8        | 1        | 34       | 14       | 1        | 1       | 0.785   | 1      | 0.121                         | 0.243             | <b>0.002</b>  |
| v05    | G        | A        | 17       | 25       | 8        | 30       | 19       | 1        | 22       | 23       | 4        | 1       | 0.622   | 0.858  | <b>0.007</b>                  | 0.184             | 0.371         |
| v06    | A        | G        | 48       | 2        | 0        | 47       | 3        | 0        | 50       | 0        | 0        | 1       | 1       | 1      | 1                             | 0.242             | 0.495         |
| v07    | T        | C        | 48       | 2        | 0        | 47       | 3        | 0        | 42       | 6        | 1        | 1       | 1       | 0.533  | 1                             | 0.235             | 0.107         |
| v08    | G        | T        | 13       | 29       | 8        | 29       | 16       | 1        | 23       | 23       | 4        | 0.385   | 0.916   | 0.909  | <b>0.000</b>                  | 0.177             | 0.09          |
| v09    | Ins      | Del      | 17       | 25       | 8        | 29       | 16       | 2        | 23       | 23       | 4        | 1       | 1.000   | 0.909  | <b>0.013</b>                  | 0.33              | 0.327         |
| v10    | C        | T        | 17       | 25       | 8        | 32       | 17       | 1        | 21       | 25       | 4        | 1       | 0.885   | 0.599  | <b>0.003</b>                  | 0.065             | 0.39          |
| v11    | G        | A        | 48       | 2        | 0        | 48       | 1        | 0        | 44       | 5        | 1        | 1       | 1       | 0.403  | 1                             | 0.157             | 0.269         |
| v12    | G        | A        | 48       | 2        | 0        | 46       | 4        | 0        | 50       | 0        | 0        | 1       | 1       | 1      | 0.678                         | 0.117             | 0.495         |
| v13    | A        | G        | 8        | 25       | 17       | 1        | 19       | 30       | 3        | 21       | 26       | 1       | 0.622   | 0.996  | <b>0.007</b>                  | 0.572             | 0.116         |
| v14    | G        | A        | 48       | 2        | 0        | 50       | 0        | 0        | 50       | 0        | 0        | 1       | 1       | 1      | 0.495                         | 1                 | 0.495         |
| v15    | C        | G        | 50       | 0        | 0        | 48       | 2        | 0        | 50       | 0        | 0        | 1       | 1       | 1      | 0.495                         | 0.495             | 1             |
| v16    | C        | T        | 2        | 23       | 24       | 2        | 26       | 22       | 4        | 18       | 28       | 0.426   | 0.192   | 0.849  | 0.879                         | 0.269             | 0.44          |
| v17    | T        | C        | 48       | 2        | 0        | 47       | 3        | 0        | 50       | 0        | 0        | 1       | 1       | 1      | 1                             | 0.242             | 0.495         |
| v18    | G        | A        | 48       | 2        | 0        | 47       | 3        | 0        | 48       | 2        | 0        | 1       | 1       | 1      | 1                             | 1                 | 1             |
| v19    | C        | T        | 50       | 0        | 0        | 50       | 0        | 0        | 49       | 1        | 0        | 1       | 1       | 1      | 1                             | 1                 | 1             |
| v20    | G        | A        | 50       | 0        | 0        | 50       | 0        | 0        | 49       | 1        | 0        | 1       | 1       | 1      | 1                             | 1                 | 1             |
| v21    | C        | T        | 49       | 1        | 0        | 50       | 0        | 0        | 50       | 0        | 0        | 1       | 1       | 1      | 1                             | 1                 | 1             |
| v22    | C        | T        | 50       | 0        | 0        | 49       | 1        | 0        | 50       | 0        | 0        | 1       | 1       | 1      | 1                             | 1                 | 1             |
| v23    | G        | A        | 45       | 5        | 0        | 48       | 2        | 0        | 48       | 2        | 0        | 1       | 1       | 1      | 0.436                         | 1                 | 0.436         |
| v24    | C        | T        | 28       | 19       | 3        | 21       | 25       | 4        | 36       | 14       | 0        | 1       | 0.599   | 0.696  | 0.365                         | <b>0.003</b>      | 0.092         |
| v25    | G        | A        | 49       | 0        | 0        | 50       | 0        | 0        | 49       | 1        | 0        | 1       | 1       | 1      | 1                             | 1                 | 1             |
| v26    | A        | C        | 44       | 5        | 0        | 40       | 9        | 1        | 32       | 17       | 1        | 1       | 0.920   | 0.885  | 0.323                         | 0.14              | <b>0.005</b>  |

H-Wpval, Hardy–Weinberg equilibrium p-value
